# Supplementary material for: Mechanochemical generation of singlet oxygen
Source: PubMed Central journal article supplement — RSC Adv. 2020 Mar 2;10(16):9182–6. doi: 10.1039/d0ra00831a (PMC9050071; doi:10.1039/d0ra00831a), 2020-03-02
Supplement: RA-010-D0RA00831A-s001.pdf [file RA-010-D0RA00831A-s001.pdf]

## **ELECTRONIC SUPPLEMENTARY INFORMATION**

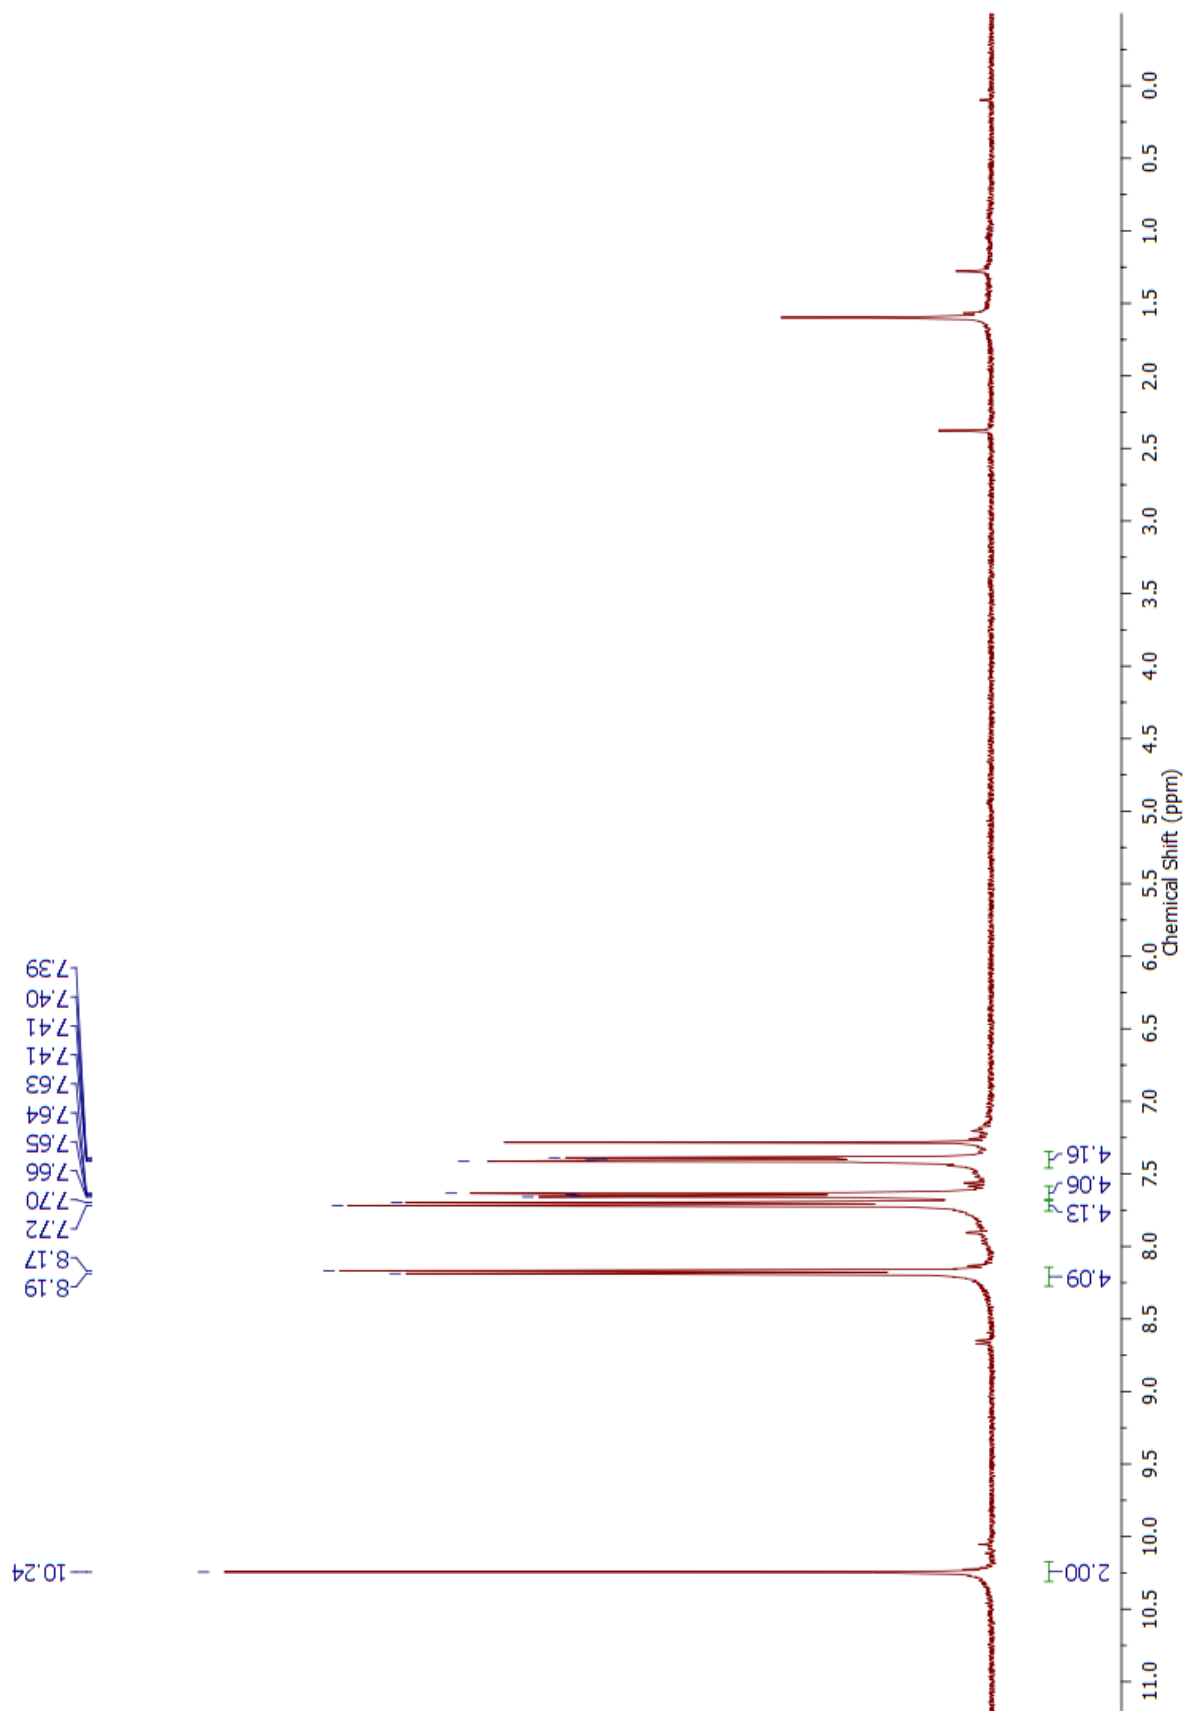

Figure S1:  $^1\text{H}$  NMR Spectrum of Compound 2

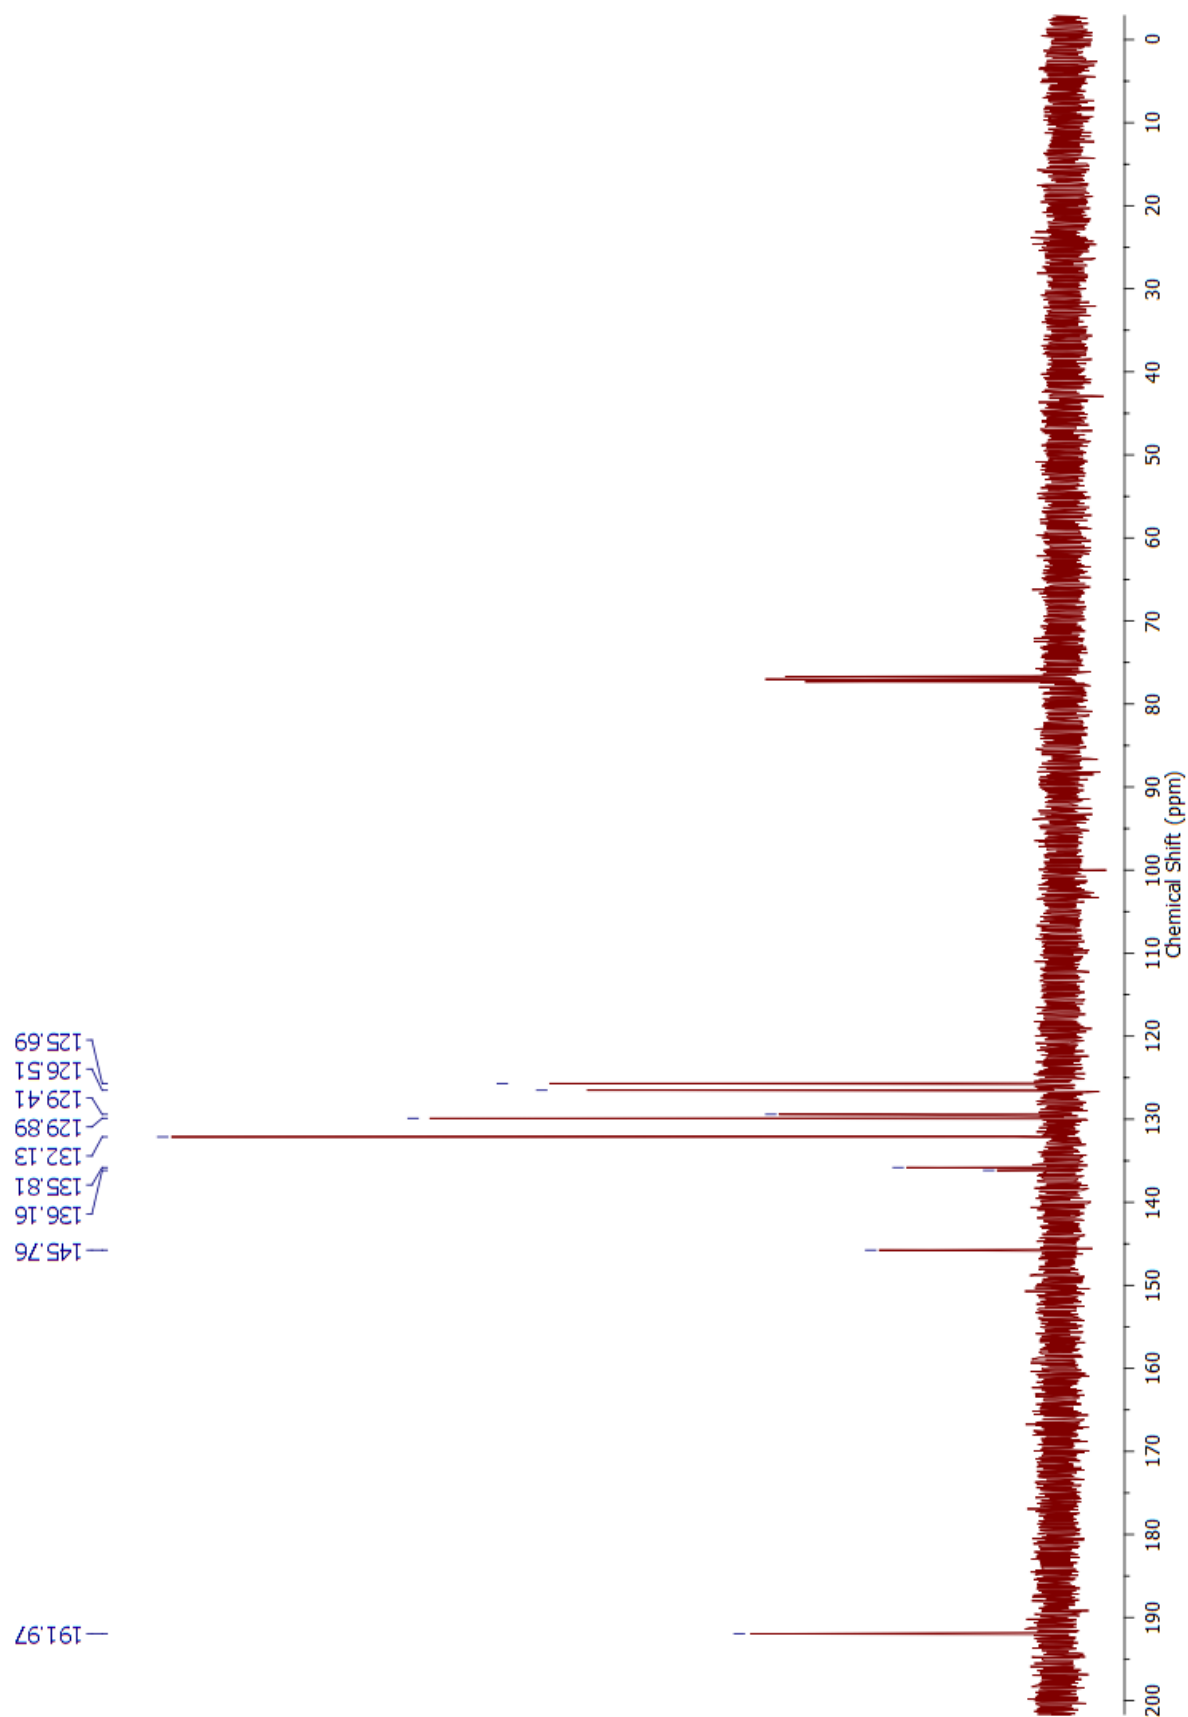

Figure S2:  $^{13}\text{C}$  NMR Spectrum of Compound 2

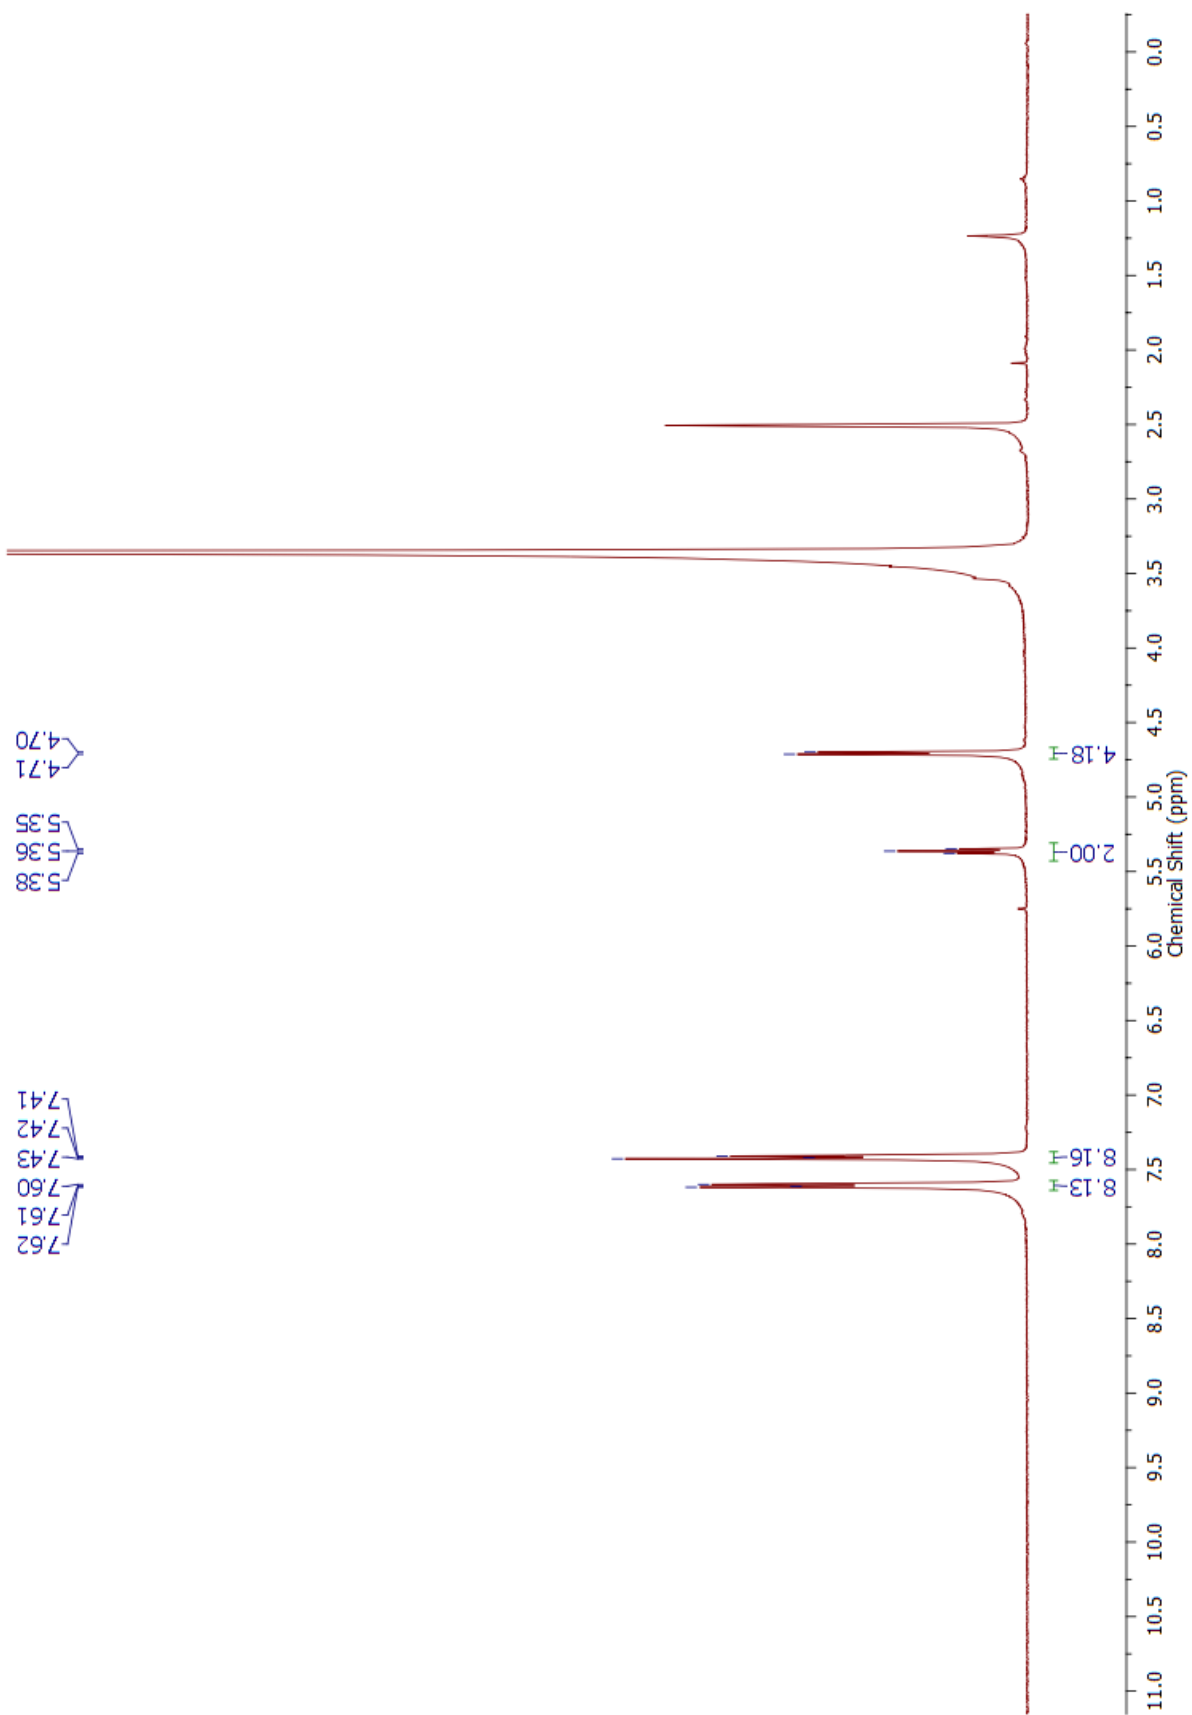

Figure S3:  $^1\text{H}$  NMR Spectrum of Compound 3

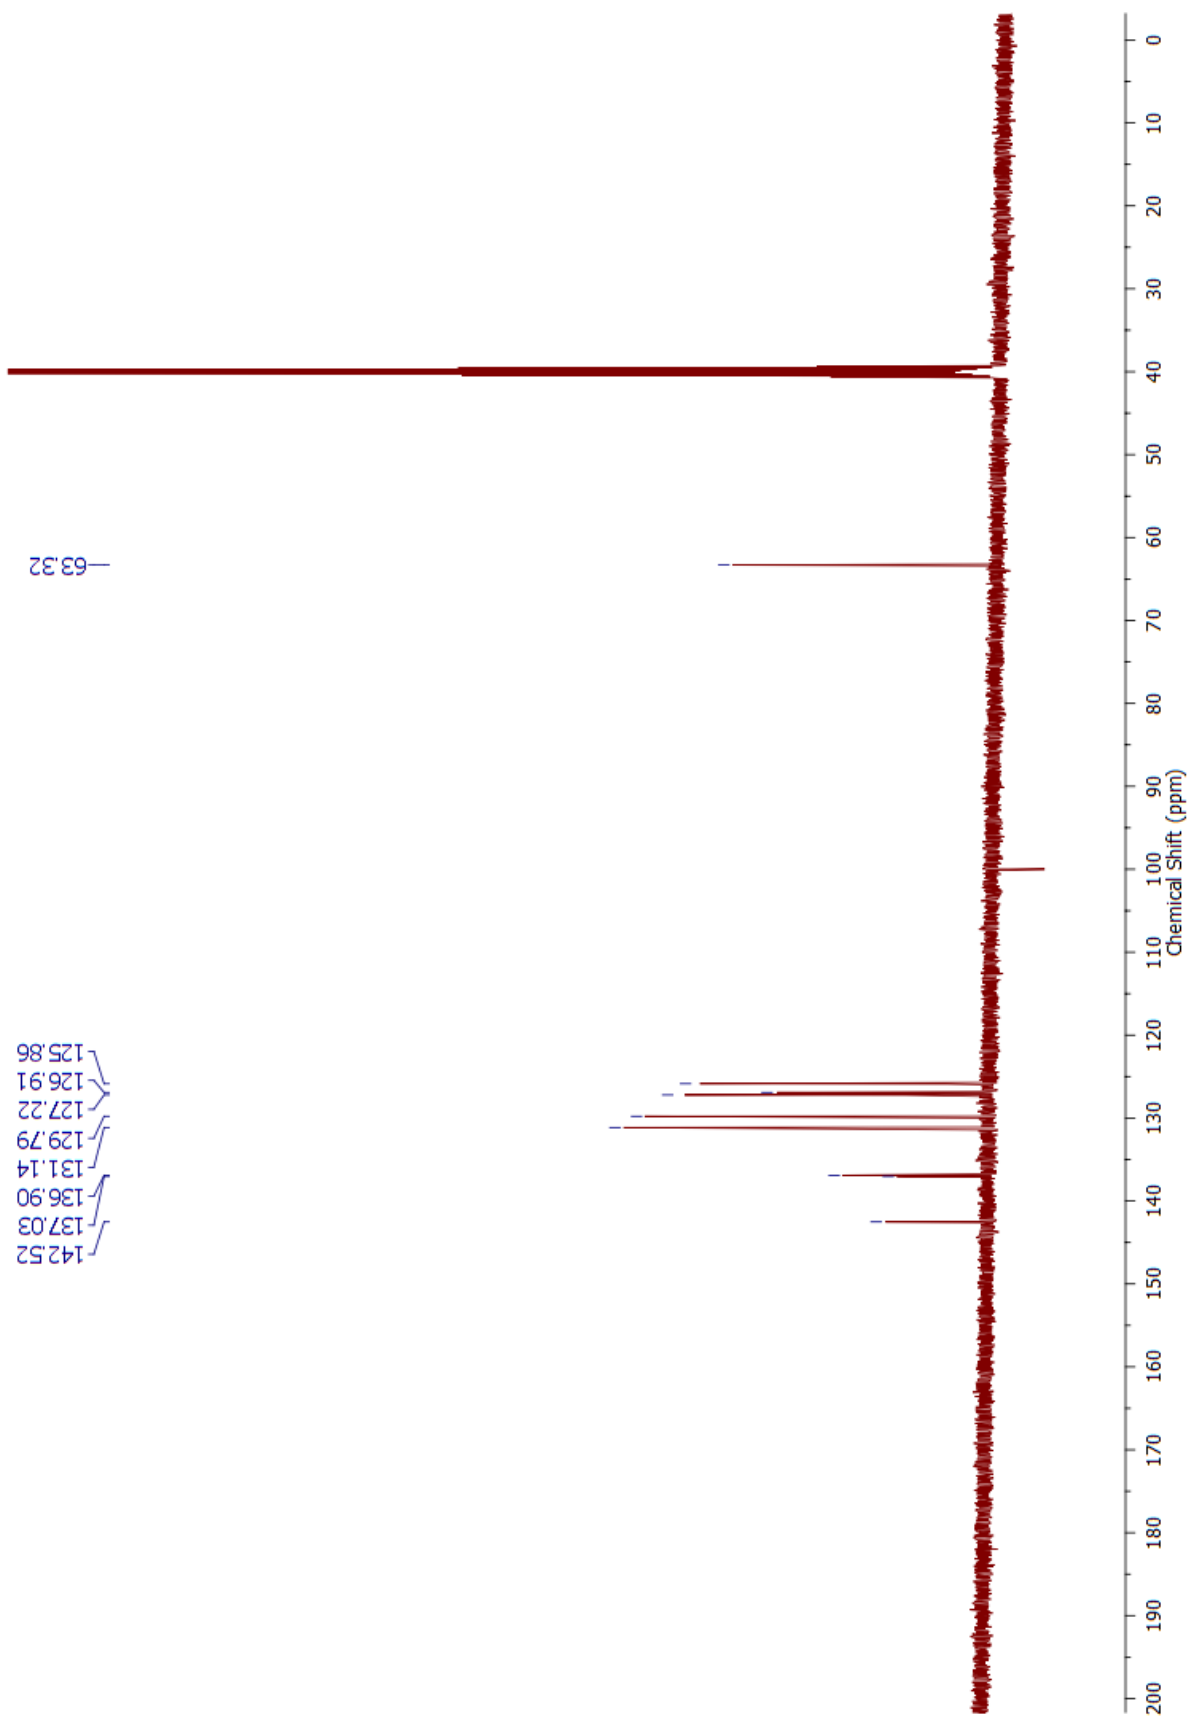

Figure S4:  $^{13}\text{C}$  NMR Spectrum of Compound 3

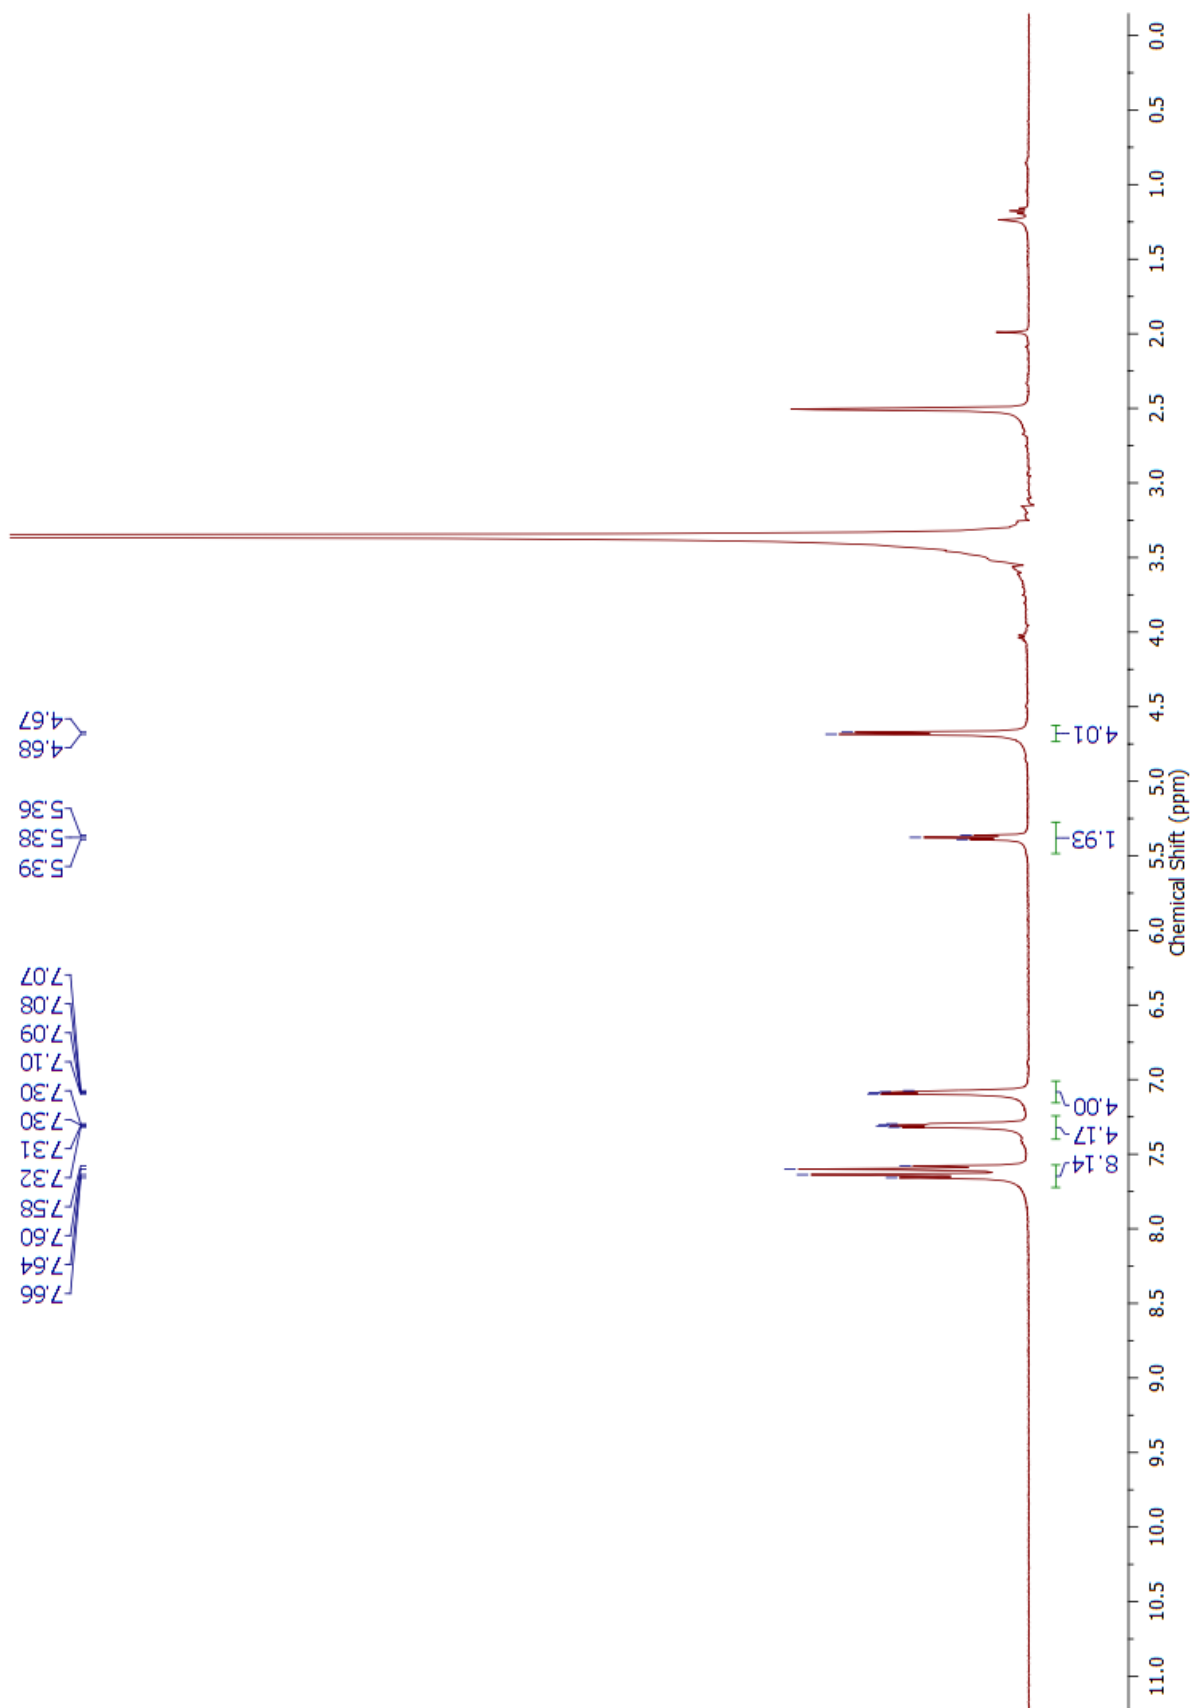

Figure S5: <sup>1</sup>H NMR Spectrum of Compound 4

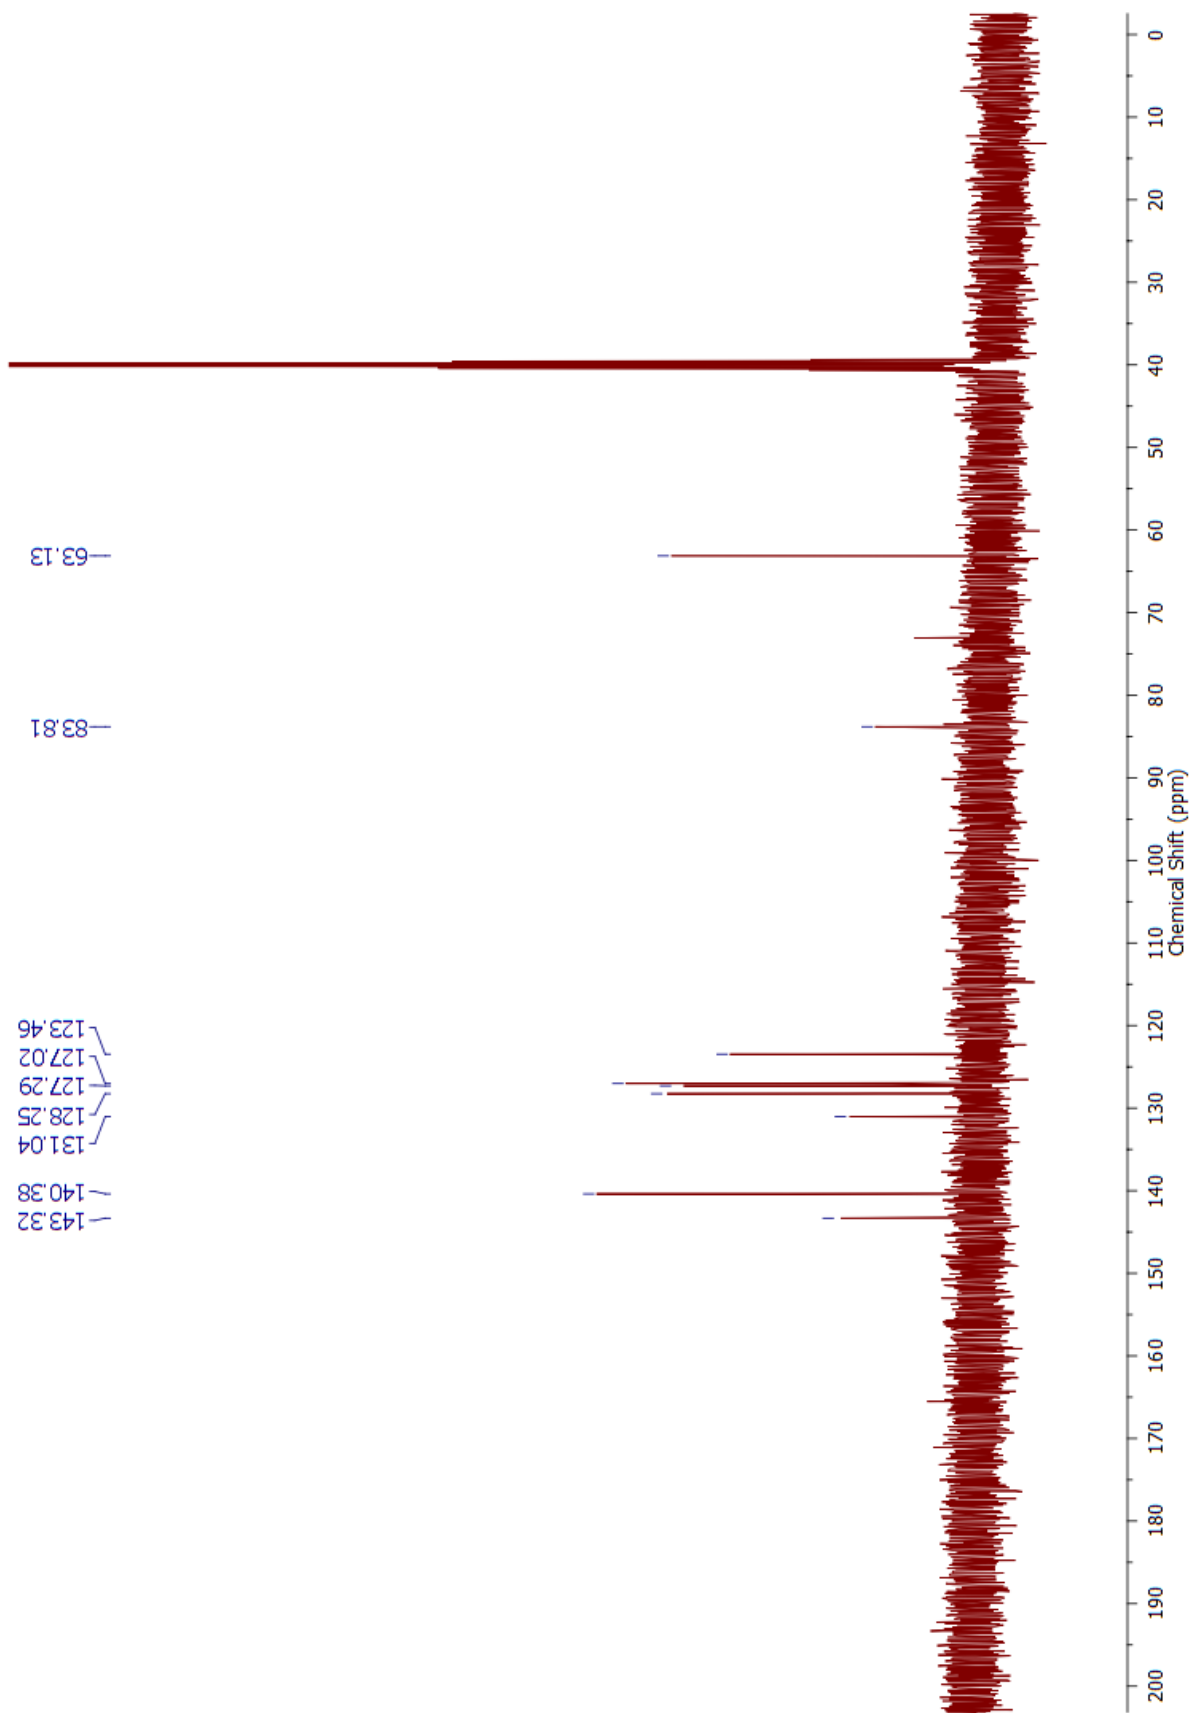

Figure S6:  $^{13}\text{C}$  NMR Spectrum of Compound 4

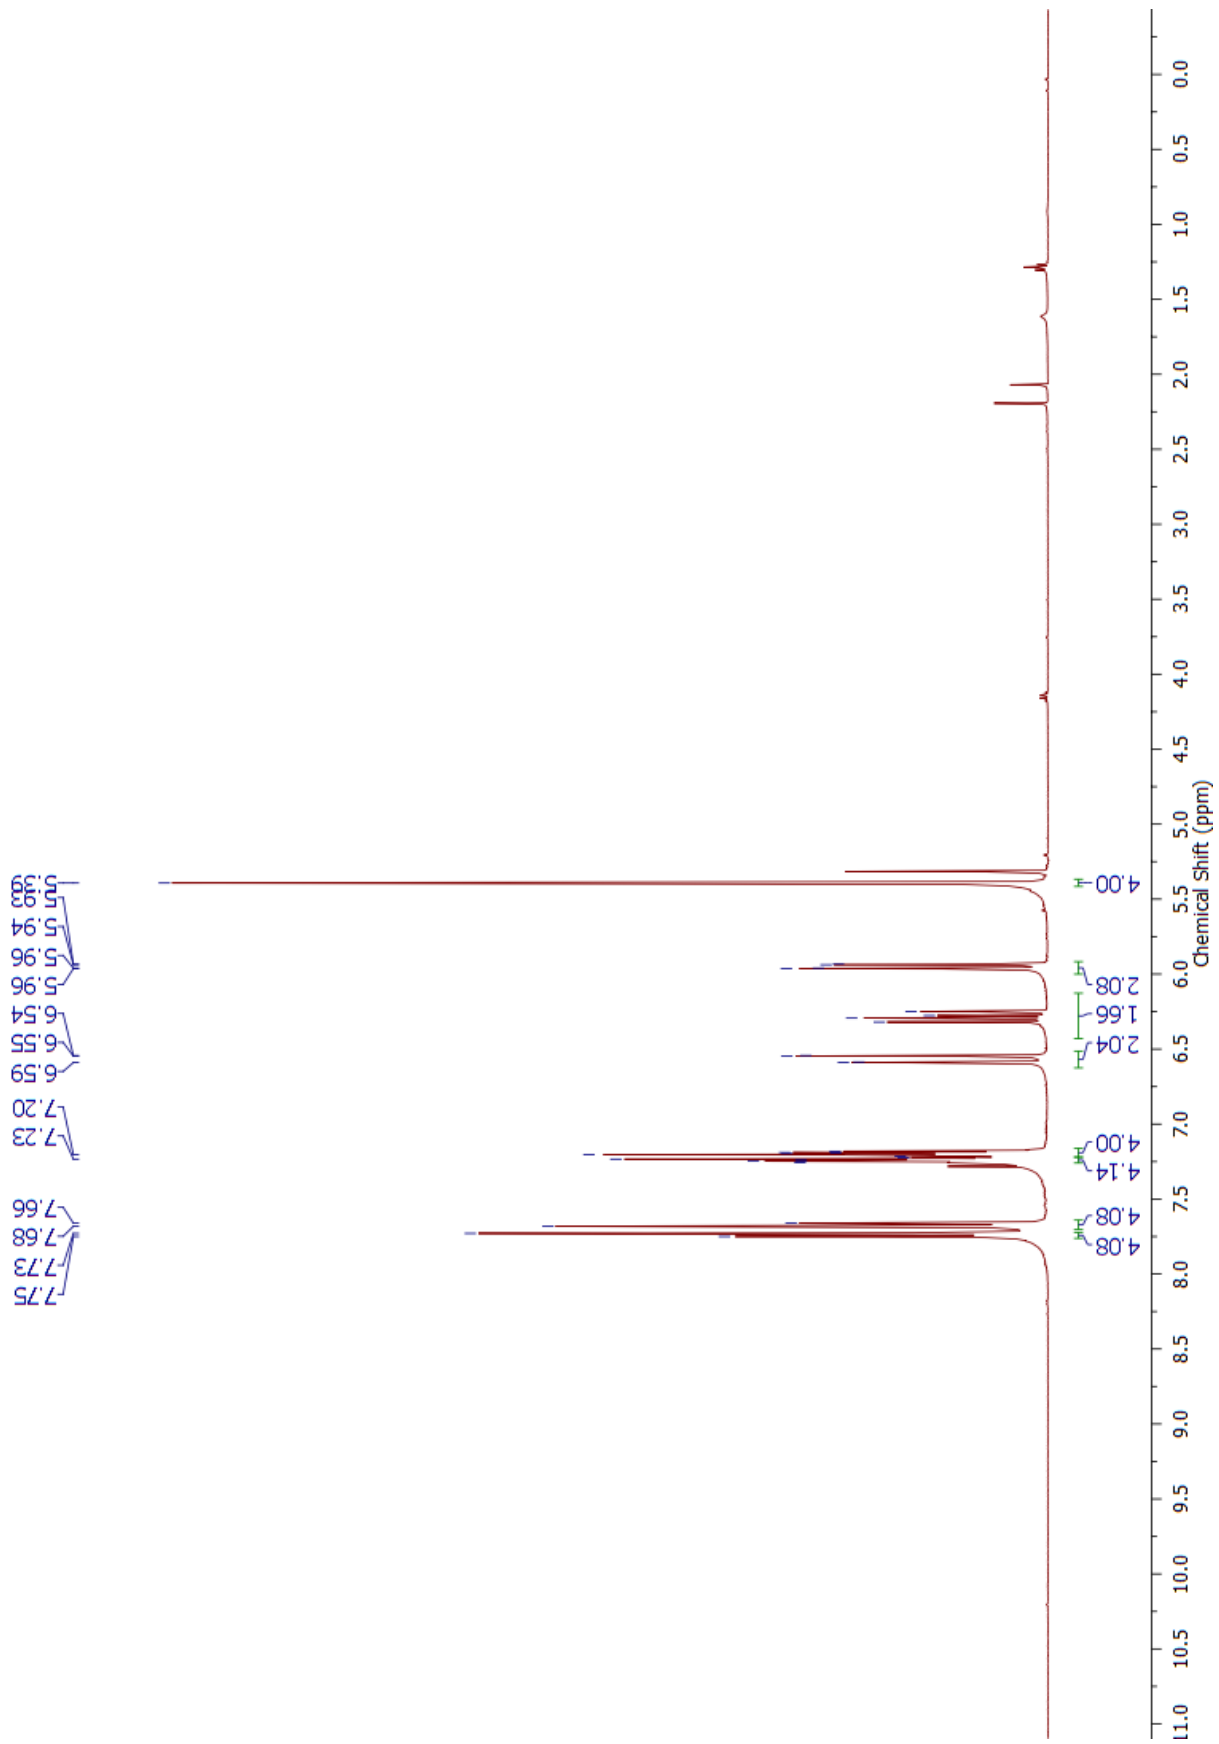

Figure S7:  $^1\text{H}$  NMR Spectrum of Compound 5



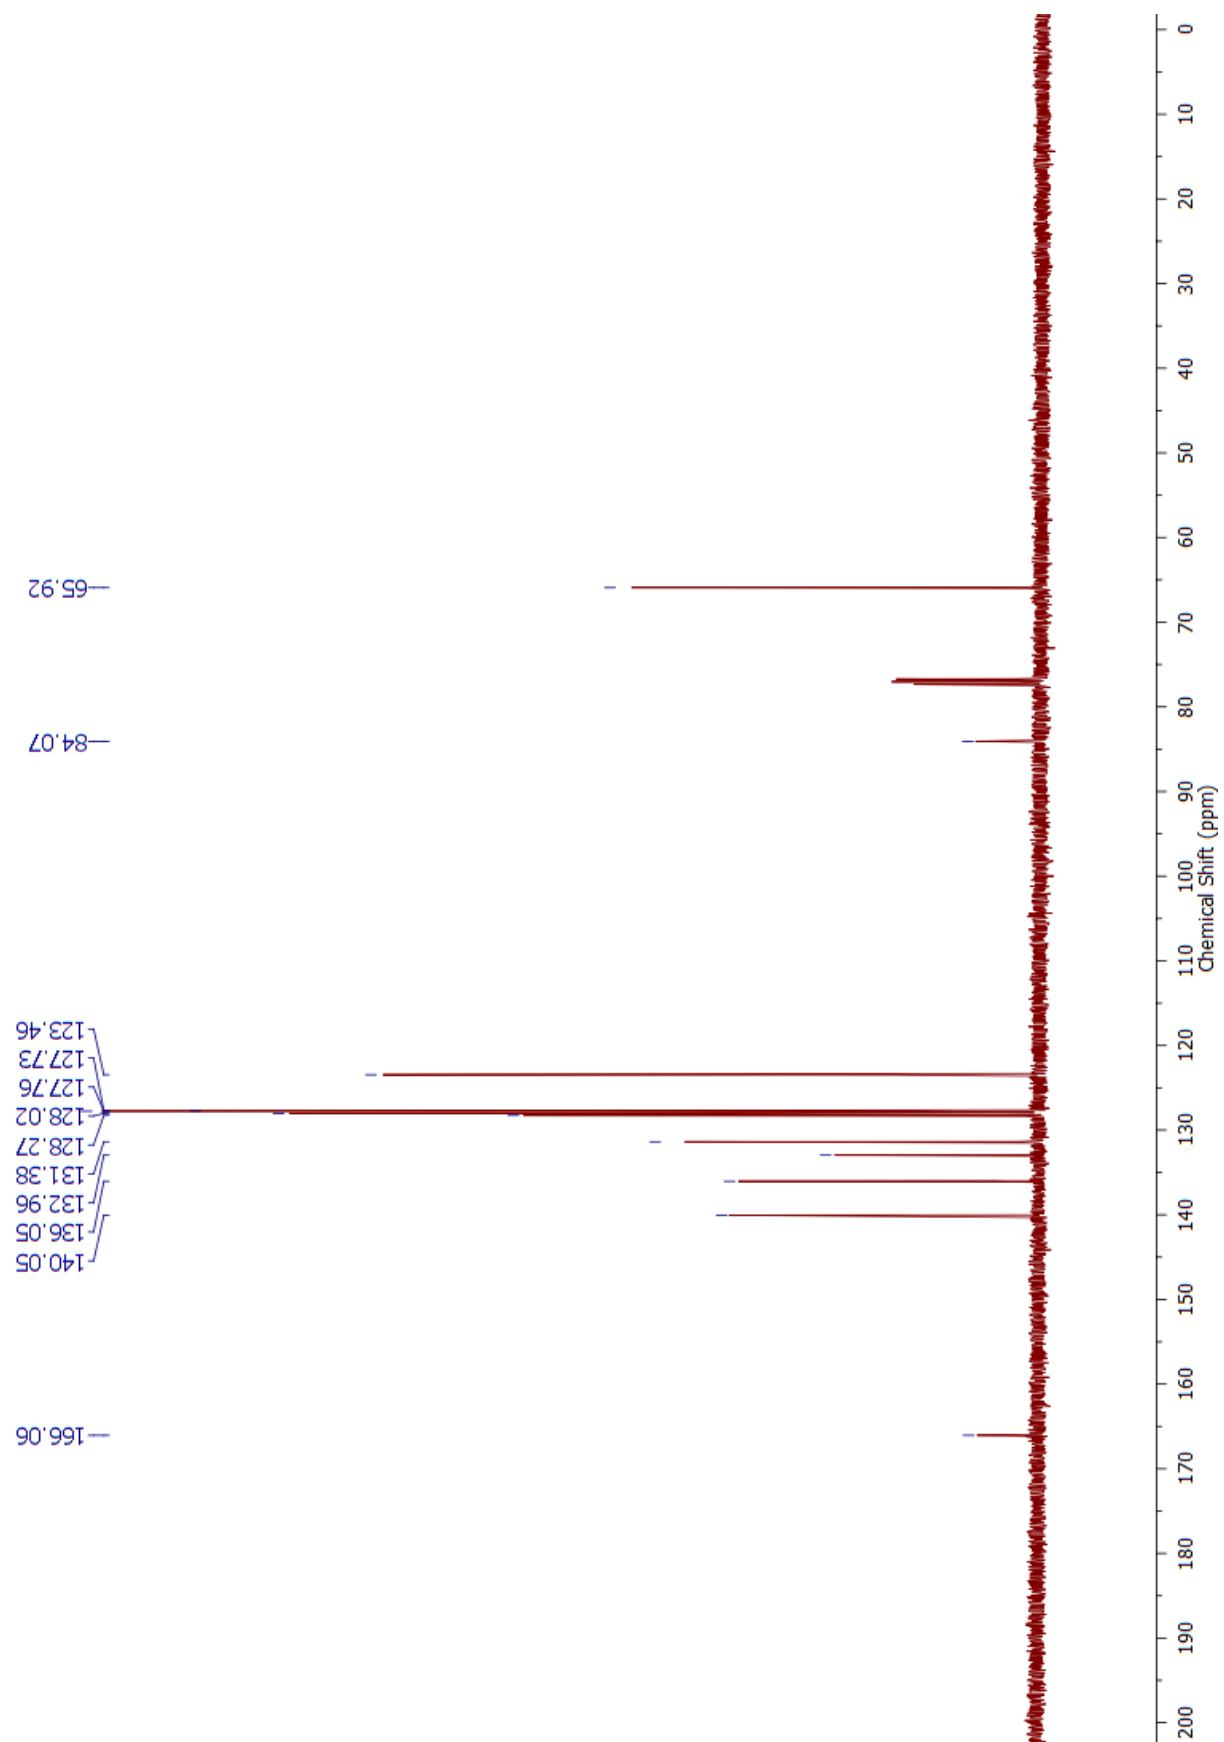

Figure S8:  $^{13}\text{C}$  NMR Spectrum of Compound 5
